# Supplementary material for: Sustainable Cellulose Nanofibers-Mediated Synthesis of Uniform Spinel Zn-Ferrites Nanocorals for High Performances in Supercapacitors
Source: MDPI journal article supplement (doi:10.3390/ijms24119169), 2023-05-24
Supplement: s1 [file s1]

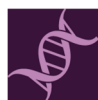

## Support Information for

# Sustainable Cellulose Nanofibers-Mediated Synthesis of Uniform Spinel Zn-ferrites Nanocorals for High Performances in Supercapacitors

Lucas T. Teixeira,<sup>1</sup> Scarllet L. S. de Lima,<sup>1</sup> Taissa F. Rosado,<sup>1</sup> Liying Liu,<sup>2</sup> Hector A. Vitorino,<sup>3</sup> Clenilton C. dos Santos,<sup>4</sup> Jhonatam P. Mendonça,<sup>5</sup> Marco A. S. Garcia,<sup>5</sup> Rogério N. C. Siqueira,<sup>1</sup> Anderson G. M. da Silva<sup>1\*</sup>

<sup>1</sup> Departamento de Engenharia Química e de Materiais – DEQM, Pontifícia Universidade Católica do Rio de Janeiro, Rio de Janeiro/RJ, Brazil.

<sup>2</sup> Centro Brasileiro de Pesquisas Físicas, Rio de Janeiro/RJ, Brazil.

<sup>3</sup> Centro de Investigación en Biodiversidad para la Salud, Universidad Privada Norbert Wiener, Lima 15046, Peru.

<sup>4</sup> Departamento de Física, Centro de Ciências Exatas e Tecnologia, Universidade Federal do Maranhão, São Luís/MA, Brazil.

<sup>5</sup> Departamento de Química, Centro de Ciências Exatas e Tecnologia, Universidade Federal do Maranhão (UFMA), São Luís/ MA, Brazil.

\* Correspondence: author: agms@puc-rio.br

**Table S1.** Textural properties measured by N<sub>2</sub>-physisorption for the Zn-ferrite spinel, Fe<sub>2</sub>O<sub>3</sub> and ZnO samples.

| Sample                         | Specific Surface Area (m <sup>2</sup> /g) | Total Pore Volume (cc/g) | Average Pore Diameter (nm) |
|--------------------------------|-------------------------------------------|--------------------------|----------------------------|
| Zn-ferrite spinel              | 33                                        | 0.19                     | 24                         |
| Fe <sub>2</sub> O <sub>3</sub> | 31                                        | 0.21                     | 27                         |
| ZnO                            | 20                                        | 0.08                     | 17                         |

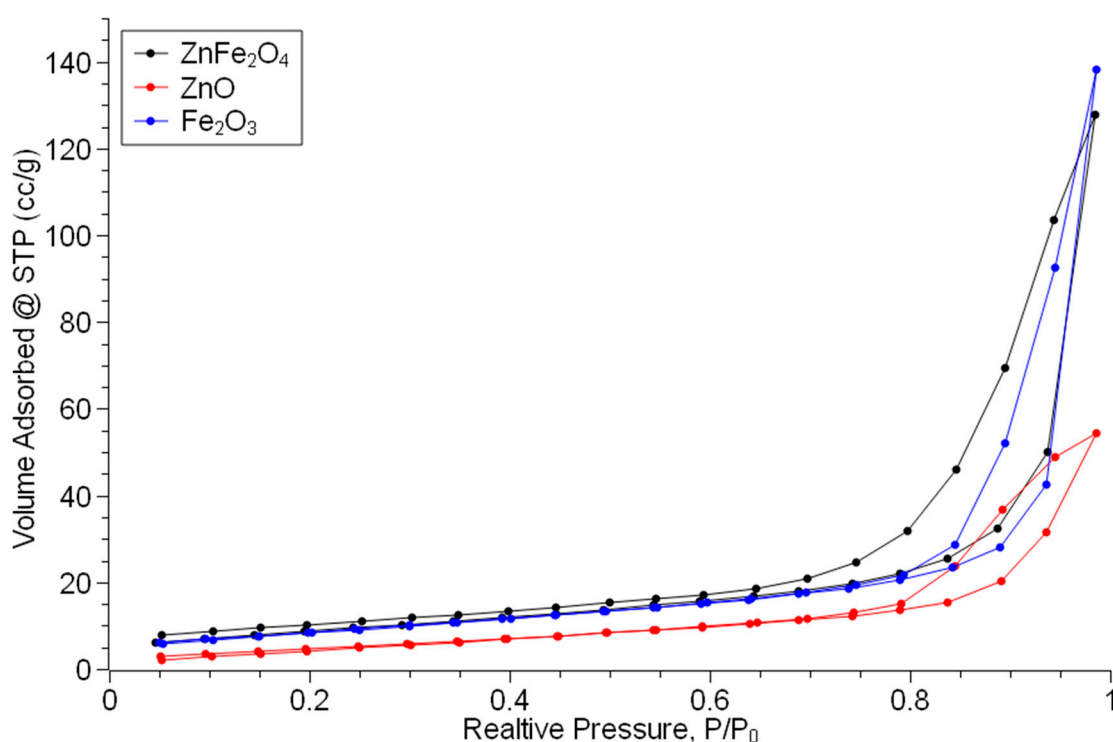

**Figure S1.** N<sub>2</sub> adsorption and desorption for Zn-ferrite (ZnFe<sub>2</sub>O<sub>4</sub>), Fe<sub>2</sub>O<sub>3</sub>, and ZnO nanocorals.

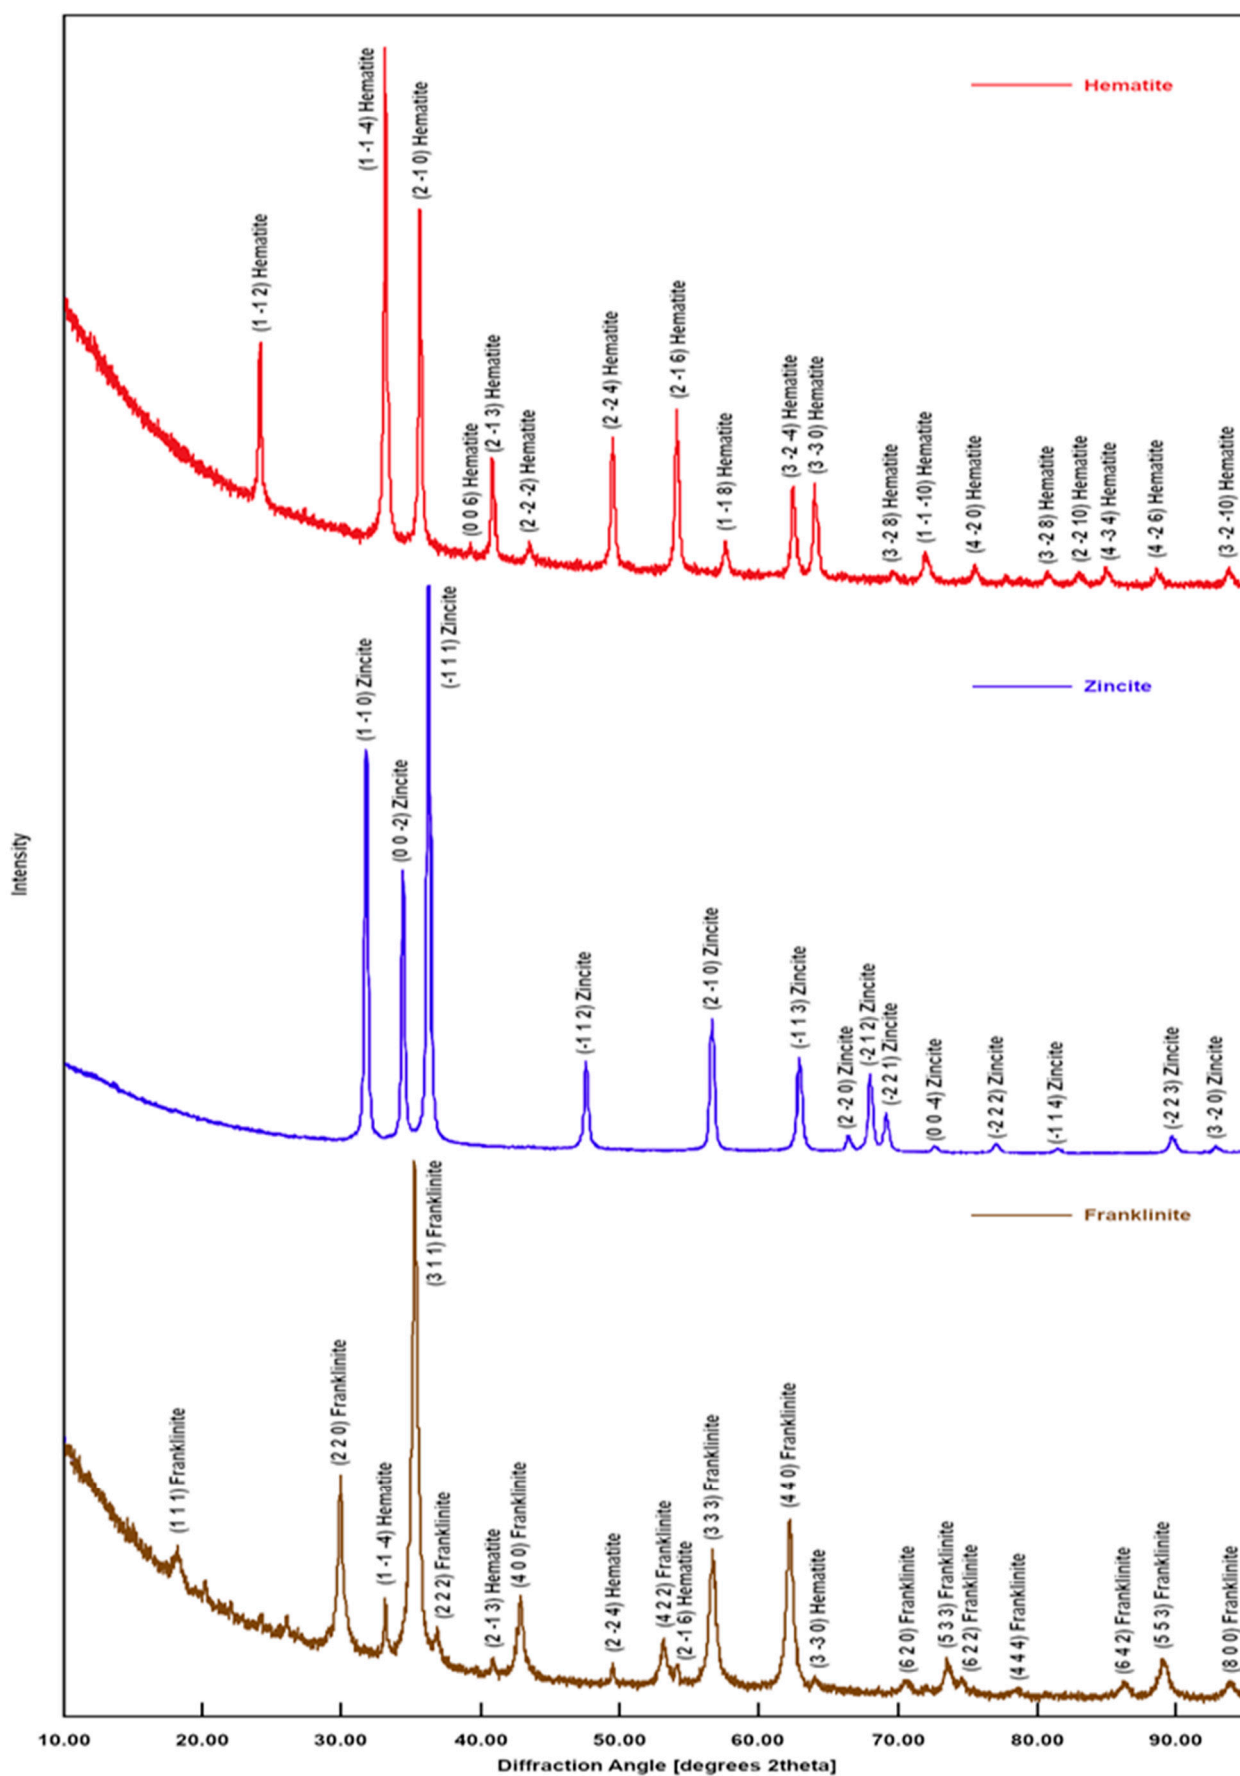

Figure S2. XRD and main diffraction peaks of Zn-ferrite, ZnO, and Fe<sub>2</sub>O<sub>3</sub> samples.

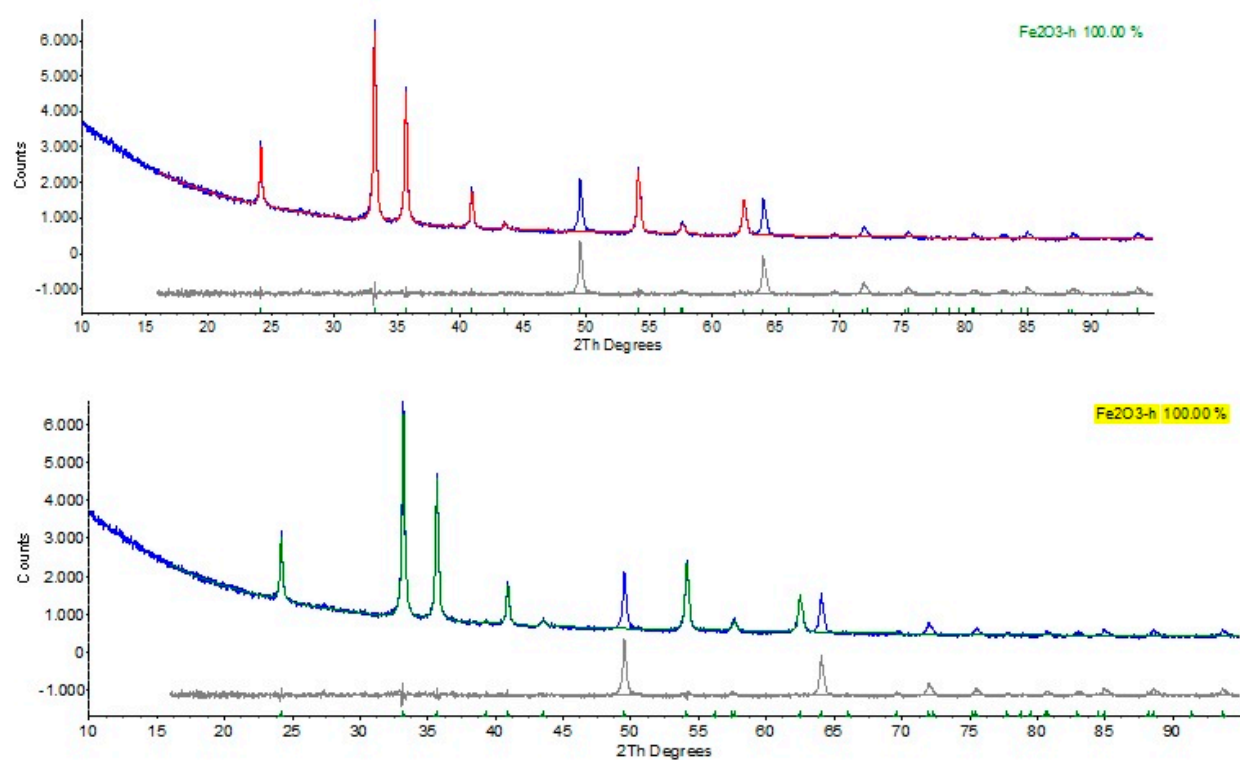

Figure S3. Rietveld refinement results for the Fe<sub>2</sub>O<sub>3</sub> sample.

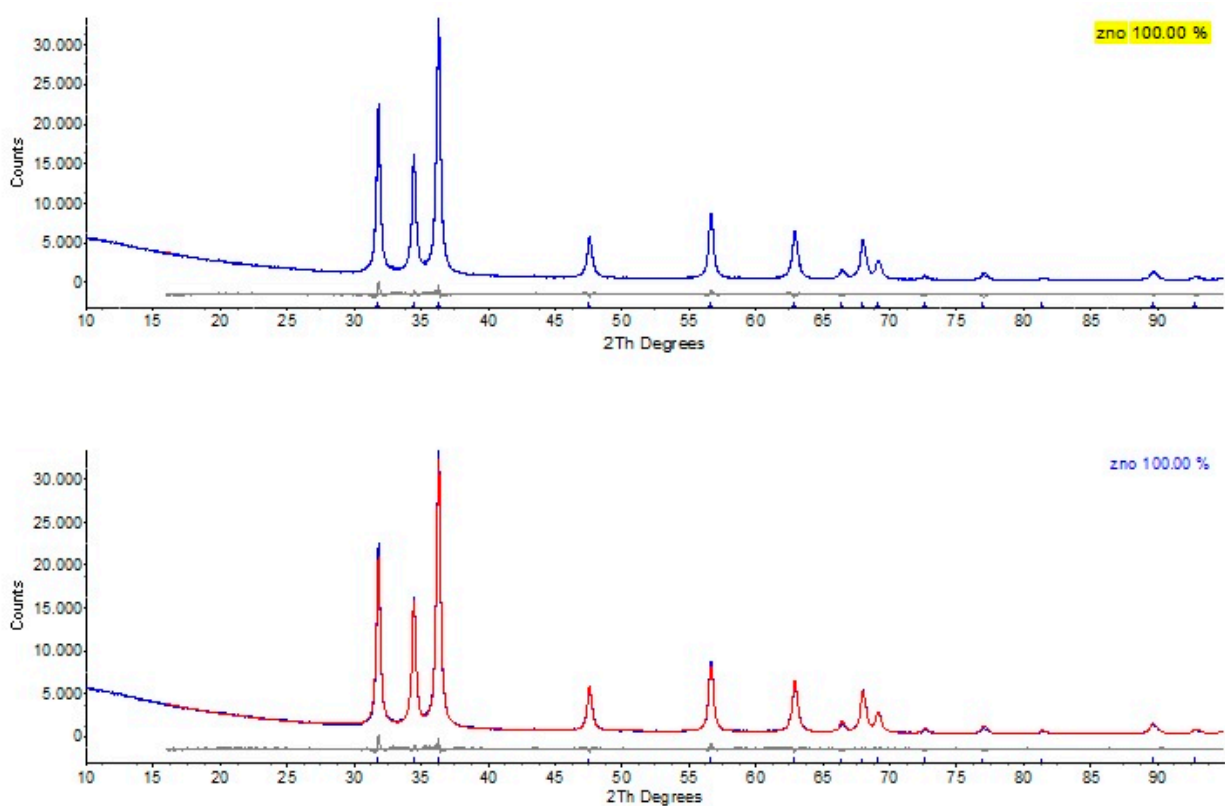

Figure S4. Rietveld refinement results for the ZnO sample.

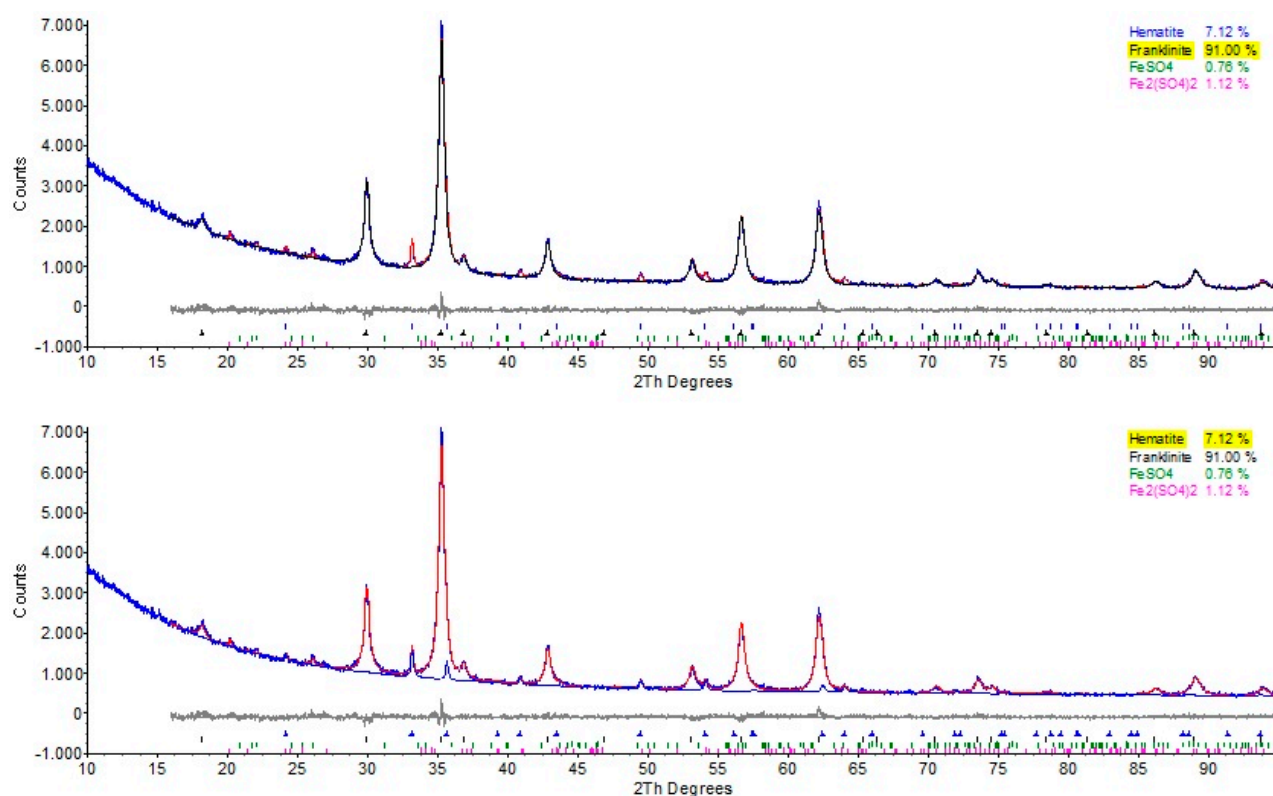

**Figure S5.** Rietveld refinement results for the Franklinite sample.

**Table S2.** Lattice parameters and mean crystallite sizes after Rietveld refinement for franklinite, zincite and hematite crystalline phases.

| Phase                     | Mean Crystallite Sizes<br>(nm) | Refined Lattice Parameters<br>(Angstrom) | Literature Lattice Parameters<br>(Angstrom) |
|---------------------------|--------------------------------|------------------------------------------|---------------------------------------------|
| $\alpha$ -hematite (R3ch) | 45.3                           | a=5.035; c=13.052                        | a=5.032; c=13.764 [49]                      |
| Zincite (P63mc)           | 26.3                           | a=3.250; c=5.207                         | a=3.252; c=5.212 [50]                       |
| Zn-ferrite (Fd3m)         | 52.8                           | a = 8.442                                | a=8.444 [51]                                |

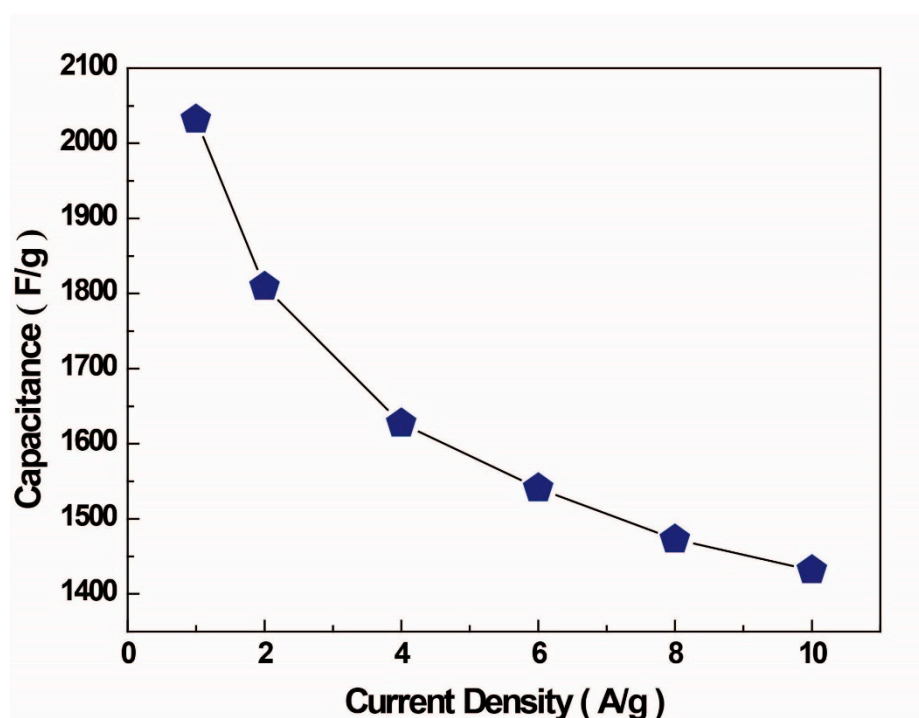

Figure S6. Capacitance vs. current density for the Zn-ferrite nanocorals.
